# Supplementary material for: Significant promotional effect of CCl4 on fullerene yield in the graphite arc-discharge reactionElectronic supplementary information (ESI) available: diagram of the experimental setup used; linear correlation plots of chromatographic peak area vs. fullerene concentration (C60 and C70); typical HPLC-UV chromatogram of the products; data for four repeats of experiments 4 and 5. See http://www.rsc.org/suppdata/cc/b3/b306921b/
Source: Royal Society of Chemistry journal article supplement (doi:10.1039/b306921b), 2003-01-01
Supplement: b306921b.pdf [file b306921b.pdf]

## ESI 1: The graphite arc-discharge setup

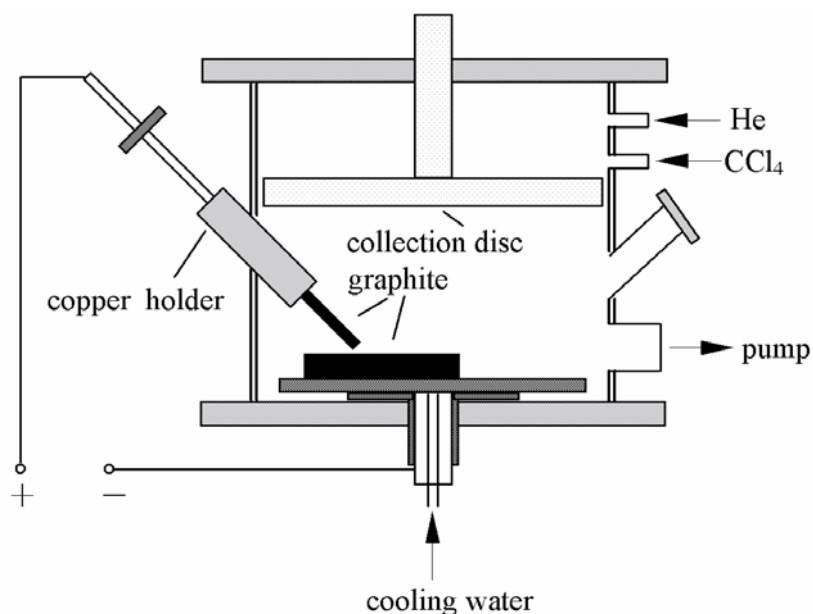

## ESI 2: Linear correlation plots of the chromatographic peak areas vs. fullerenes (C<sub>60</sub>, C<sub>70</sub>) concentrations

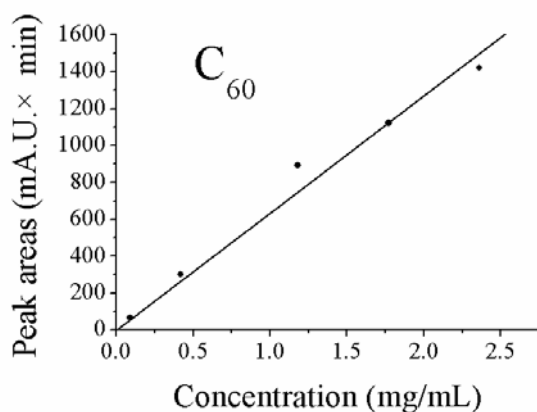

C<sub>60</sub>  
Injection volume: 20 μL  
Linear equation: Y = 635 × X  
Y - Peak area (mA.U. × min)  
X - Concentration (mg/mL)  
Correlation coefficient: R = 0.992  
Limit of detection: 6 × 10<sup>-3</sup> mg/mL

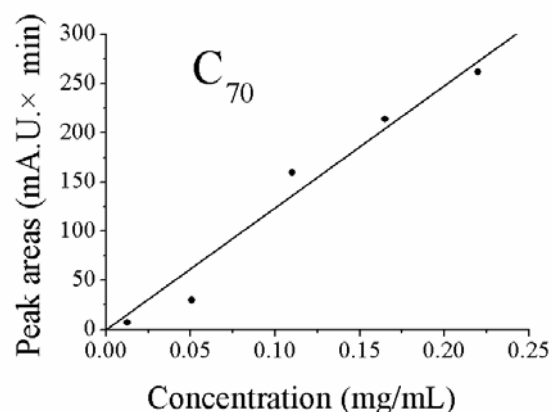

C<sub>70</sub>  
Injection volume: 20 μL  
Linear equation: Y = 1238 × X  
Y - Peak area (mA.U. × min)  
X - Concentration (mg/mL)  
Correlation coefficient: R = 0.984  
Limit of detection: 3 × 10<sup>-3</sup> mg/mL
